# Supplementary material for: Sensitivity of Small Cell Lung Cancer to BET Inhibition Is Mediated by Regulation of ASCL1 Gene Expression
Source: Oxford University Press journal article supplement (doi:10.1158/1535-7163.mct-15-0037), 2015-08-07
Supplement: 15357163mct150037-sup-143947_3_supp_0_ns7flt.xlsx [file 15357163mct150037-sup-143947_3_supp_0_ns7flt.xlsx]

## Sheet: Sheet1
Probeset	Locus	Gene	H2227					DMS53						H1048						H1694
			p-Value	w/ JQ1	w/o JQ1	EC50, nM	Fold change	p-Value	w/ JQ1	w/o JQ1	EC50, nM	Fold change	p-Value	w/ JQ1	w/o JQ1	EC50, nM	Fold change	p-Value	w/ JQ1	w/o JQ1	EC50, nM	Fold change
11726673_s_at	LOC429	ASCL1	4.0979e-07	82.167	288.41	28.678	-3.51005	2.9704e-05	118.407	576.199	38.224	-4.86626	0.70576	7.95	9.529	145.155	-1.19862	0.17766	9.148	12.127	0.053	-1.32564
11726824_a_at	LOC147929	ZNF565	0.0026067	12.736	42.159	61.473	-3.31022	0.011499	16.214	32.954	145.155	-2.03244	0.28551	13.408	18.894	99.143	-1.40916	0.21841	17.876	22.601	145.155	-1.26432
11743149_at	LOC7570	ZNF22	4.2235e-06	81.369	268.789	119.793	-3.30333	1.7054e-06	103.427	244.086	119.963	-2.35998	3.7382e-06	180.908	317.814	81.936	-1.75677	6.3676e-05	96.355	173.485	145.155	-1.80048
11724327_a_at	LOC79072	FASTKD3	0.0021957	20.35	58.963	192.929	-2.89744	1.3416e-05	51.96	119.98	90.13	-2.30908	5.0792e-06	67.582	103.163	50.876	-1.52649	4.9259e-05	87.797	171.907	90.13	-1.95801
11726675_at	LOC429	ASCL1	2.4301e-07	708.003	2011.33	26.071	-2.84084	1.395e-06	940.065	2555.72	42.046	-2.71866	0.79949	8.212	10.338	46.251	1.25889	0.67846	8.446	10.028	376.494	1.18731
11758589_s_at	LOC2072	ERCC4	0.043818	40.339	113.163	55.885	-2.8053	0.0013557	15.154	30.51	212.521	-2.01333	0.013632	30.07	42.877	193.201	-1.42591	0.0050135	29.549	47.735	175.637	-1.61545
11723066_a_at	LOC203245	NAIF1	0.004786	14.082	39.113	13.378	-2.77752	0.00088129	33.896	78.94	61.56	-2.32889	0.00025815	15.796	30.827	46.251	-1.95157	0.00017753	14.407	26.903	67.716	-1.86736
11759563_a_at	0	EPC1	0.001051	40.406	107.341	413.56	-2.65656	1.3568e-05	38.886	90.011	145.155	-2.31474	9.9001e-05	63.009	123.821	131.959	-1.96513	0.00027969	84.449	140.374	212.521	-1.66223
11737644_a_at	LOC138065	RNF183	0.011264	9.96	25.306	81.821	-2.54076	0.00025039	16.259	36.917	13.397	-2.27056	0.1887	6.276	8.352	6569.59	-1.33078	0.87986	7.808	8.492	0.245	1.0876
11725488_a_at	LOC22863	KIAA0831	0.0013824	17.637	44.518	256.788	-2.52413	0.00091896	43.347	105.731	12.179	-2.43918	0.01026	41.559	74.318	282.865	-1.78825	0.00012053	68.95	121.132	109.057	-1.75681
11755791_a_at	LOC163786	SASS6	0.002978	29.963	73.949	28.678	-2.46801	1.1009e-06	41.647	95.485	81.936	-2.29272	0.0087532	59.175	91.594	233.773	-1.54785	0.00071589	31.16	60.578	67.716	-1.94409
11726231_at	LOC8431	NR0B2	0.045074	12.422	29.809	10.051	-2.39969	2.4404e-07	64.703	217.33	28.718	-3.35889	0.3612	7.444	8.252	1.646	-1.10854	0.63632	7.405	8.366	4.269	1.12978
11754743_a_at	LOC57703	CWC22	0.003283	64.683	154.668	212.221	-2.39117	1.5444e-06	106.629	298.59	159.67	-2.80027	0.00012929	139.42	268.852	99.143	-1.92836	1.793e-07	148.045	290.94	131.959	-1.96521
11716344_a_at	LOC85364	ZCCHC3	1.229e-05	87.23	206.304	233.444	-2.36506	2.5691e-05	34.611	136.256	175.637	-3.93678	0.00050015	89.485	166.605	109.057	-1.86182	9.3075e-05	72.816	143.25	175.637	-1.96729
11726674_at	LOC429	ASCL1	1.0467e-06	1466.95	3365.96	34.7	-2.29452	1.6543e-08	1309.95	3710.76	55.963	-2.83275	0.77002	7.068	12.702	38.224	1.79711	0.7294	8.379	9.663	1429.73	1.15324
11755033_a_at	LOC2551	GABPA	0.0032624	24.25	54.723	192.929	-2.25662	0.0014869	17.693	47.553	131.959	-2.68767	0.32272	69.523	93.32	233.773	-1.34229	0.098744	106.973	150.363	46.251	-1.40562
11743147_at	LOC7570	ZNF22	0.0020756	50.3	110.844	282.467	-2.20366	1.4765e-05	65.563	145.313	109.057	-2.21639	8.4688e-06	104.032	196.933	50.876	-1.893	0.00020043	65.022	117.144	99.143	-1.80161
11731501_at	LOC84294	UTP23	0.02082	69.661	151.106	108.903	-2.16916	9.2703e-06	67.476	158.074	99.143	-2.34267	0.0010043	59.412	98.688	38.224	-1.66108	0.00013959	64.832	128.409	119.963	-1.98064
11717968_at	LOC51259	TMEM216	0.0089607	37.57	81.039	233.444	-2.15701	5.4764e-07	44.459	152.427	119.963	-3.42848	0.0044248	157.496	205.201	21.576	-1.3029	6.2665e-05	127.869	207.525	99.143	-1.62295
11733104_at	LOC10714	POLD3	0.00068349	12.588	26.501	175.39	-2.10526	0.00015378	41.023	104.542	46.251	-2.54838	0.10127	36.867	51.256	6.875	-1.39029	0.01281	26.059	39.758	67.716	-1.52569
11731119_a_at	LOC79736	C17orf42	0.00032795	83.326	175.188	67.62	-2.10244	1.7254e-06	50.175	129.091	212.521	-2.57282	0.0067784	74.984	106.637	61.56	-1.42213	0.00033007	170.184	243.738	131.959	-1.4322
11728314_at	LOC7707	ZNF148	0.0083261	23.197	48.547	233.444	-2.09281	0.002569	10.597	22.086	175.637	-2.08417	0.13346	28.86	42.538	212.521	-1.47394	0.067678	28.449	47.062	17.832	-1.65426
11733102_at	LOC10714	POLD3	0.00068482	76.573	155.749	144.95	-2.03399	1.537e-08	143.959	315.317	67.716	-2.19033	0.002835	149.249	216.162	193.201	-1.44833	2.3294e-06	107.178	185.294	90.13	-1.72884
11722272_at	LOC84437	KIAA1826	0.044658	26.983	54.591	90.003	-2.02316	0.00066096	23.709	81.986	28.718	-3.45801	0.40024	5.807	7.273	1.81	1.25245	0.054583	19.423	45.792	61.56	-2.35762
11732200_at	LOC5326	PLAGL2	0.014751	54.677	110.182	46.186	-2.01514	1.4988e-06	27.798	61.935	119.963	-2.22804	0.025008	43.288	62.756	90.13	-1.44973	0.017813	21.895	42.028	1181.6	-1.91953
11734404_s_at	LOC132430	PABPC4L	0.017037	31.327	62.964	6.865	-2.0099	0.0059487	9.65	20.499	31.59	-2.12425	0.65466	6.068	7.759	0.064	1.27868	0.24214	7.55	8.224	1.991	-1.08927
11721575_at	LOC128061	C1orf131	0.04302	105.658	211.843	28.678	-2.00499	1.8198e-07	37.917	125.886	257.15	-3.32004	0.0010103	188.9	276.187	67.716	-1.46208	1.2876e-06	164.619	291.306	131.959	-1.76958
11739951_a_at	LOC54438	GFOD1	0.00027806	40.993	82.106	192.929	2.00293	0.00042716	22.085	48.392	74.487	2.19117	0.015218	76.251	95.687	119.963	1.2549	0.00067718	93.992	135.847	159.67	1.4453
11757453_s_at	LOC23177	CEP68	5.1426e-05	274.469	555.31	159.445	2.02322	5.2006e-07	69.299	189.585	109.057	2.73575	0.00024513	99.137	157.794	81.936	1.59168	0.0014963	335.207	502.324	119.963	1.49855
11739952_a_at	LOC54438	GFOD1	0.012861	16.578	33.645	108.903	2.0295	0.0039334	10.597	22.294	212.521	2.1038	0.31884	30.124	36.127	414.143	1.19928	0.063267	34.758	49.382	145.155	1.42074
11757590_s_at	LOC339122	RAB43	0.024776	21.015	42.767	375.963	2.03507	0.0011391	19.138	41.71	42.046	2.17943	0.36814	37.913	61.204	1.36	1.61433	0.049754	12.489	19.975	1299.76	1.59941
11727277_a_at	LOC92691	TMEM169	0.00054721	48.309	102.768	55.885	2.12731	0.024349	9.847	20.368	282.865	2.06845	0.0023506	17.352	22.702	28.718	1.30832	0.018142	156.068	196.333	4.269	1.258
11746126_s_at	LOC10734, LOC442578, LOC442582, LOC54441	STAG3 || STAG3L3 || STAG3L2 || STAG3L1	2.0546e-05	110.387	240.581	67.62	2.17943	1.8823e-06	71.082	144.715	99.143	2.03589	0.039525	35.097	58.584	55.963	1.6692	0.0039928	78.586	111.427	81.936	1.4179
11756543_a_at	LOC10482	NXF1	1.6139e-06	599.394	1315.34	144.95	2.19444	9.2235e-08	479.04	1043.45	81.936	2.17821	2.7429e-05	668.592	1200.27	50.876	1.79521	3.1018e-05	596.377	1050.88	119.963	1.7621
11735520_a_at	LOC8817	FGF18	0.0081954	9.45	20.76	119.793	2.19683	5.7769e-07	11.269	29.509	376.494	2.6186	0.0029694	7.626	11.128	109.057	1.45922	1.8139e-05	7.398	13.744	311.152	1.8578
11730776_s_at	LOC23177	CEP68	0.0014803	63.037	138.974	175.39	2.20464	3.519e-07	17.171	45.625	99.143	2.6571	0.37806	18.92	25.34	99.143	1.33932	0.038879	87.866	140.011	606.347	1.59346
11729120_x_at	LOC3304	HSPA1B	6.6732e-06	267.14	592.474	38.17	2.21784	0.00034277	226.803	453.675	55.963	2.0003	1.6911e-05	233.212	425.55	34.749	1.82473	6.0717e-07	187.071	325.201	99.143	1.73838
11730633_at	LOC4117	MAK	4.6577e-05	14.233	31.617	74.382	2.22139	0.00010316	8.666	19.986	145.155	2.30625	0.37306	9.938	11.426	26.107	1.14973	0.19414	7.884	8.977	17.832	1.13864
11718641_a_at	LOC8509	NDST2	0.00055765	14.773	32.829	282.467	2.22223	3.4873e-06	13.354	32.632	159.67	2.44361	0.29698	12.271	14.422	0.635	1.17529	0.0062666	10.776	19.776	606.347	1.83519
11720823_at	LOC182	JAG1	0.00018204	22.358	50.653	413.56	2.26554	0.0020132	10.317	23.576	257.15	2.28516	0.68854	20.739	25.298	6569.59	1.21983	0.22647	7.992	10.007	1729.98	1.25213
11725569_at	LOC80311	KLHL15	5.1388e-06	80.285	182.874	61.473	2.27781	5.8882e-08	103.288	277.76	67.716	2.68918	0.010692	64.747	92.246	1181.6	1.42471	0.0018493	238.152	327.419	81.936	1.37483
11720254_a_at	LOC26504	CNNM4	5.0486e-07	14.957	34.682	67.62	2.31878	6.51e-06	24.856	92.875	81.936	3.73652	0.0029509	27.109	46.083	81.936	1.69992	0.0087151	16.564	24.037	311.152	1.45116
11757814_s_at	LOC253512	SLC25A30	1.112e-05	15.968	37.256	233.444	2.33317	1.4777e-05	14.999	31.961	99.143	2.13088	0.0065795	14.223	18.822	99.143	1.32335	0.00028633	14.8	26.269	14.737	1.77493
11740032_s_at	LOC11072	DUSP14	2.0569e-06	124.819	295.638	67.62	2.36853	1.7172e-07	102.484	218.4	67.716	2.13106	0.0029235	194.057	284.138	233.773	1.4642	0.0012193	337.774	444.979	159.67	1.31739
11739530_at	LOC5342	PLGLB2	0.0046299	16.556	41.629	500.407	2.51444	0.00064142	12.4	25.172	109.057	2.03	0.011464	16.981	29.002	17.832	1.70791	0.00063282	11.04	16.887	74.487	1.52962
11743098_a_at	LOC123283	TARSL2	4.9435e-06	40.011	100.64	108.903	2.51531	0.00015721	37.493	83.849	233.773	2.23639	0.00087835	20.443	35.397	74.487	1.7315	7.0687e-05	88.552	155.165	342.267	1.75225
11757513_at	LOC64332	NFKBIZ	8.9257e-05	15.245	41.338	99.003	2.71158	1.3581e-06	37.654	117.16	233.773	3.11149	0.00014033	47.192	90.978	90.13	1.92783	0.65679	5.962	6.63	0.577	-1.11204
11719424_at	LOC84792	C7orf70	1.9245e-06	37.545	103.615	99.003	2.75975	0.00014656	33.35	73.051	131.959	2.19043	7.3417e-05	46.723	93.186	90.13	1.99444	5.4029e-05	79.051	156.656	976.528	1.98171
11721902_a_at	LOC5274	SERPINI1	1.6161e-05	55.4	157.187	131.773	2.83731	5.2322e-05	66.62	157.247	90.13	2.36036	0.00057081	14.394	27.928	119.963	1.94025	0.24272	7.836	10.868	81.936	1.38693
11740117_a_at	LOC11237	RNF24	0.0002887	24.991	71.659	131.773	2.86739	0.00023808	33.65	73.582	257.15	2.18669	0.0084621	66.921	87.726	145.155	1.31089	0.010997	96.092	117.15	2.191	1.21914
11720353_s_at	LOC2119	ETV5	4.4243e-05	29.693	90.34	131.773	3.04247	4.3474e-05	74.404	179.484	99.143	2.41229	0.082565	26.845	34.331	67.716	1.27886	0.010061	41.324	56.715	311.152	1.37245
11726113_a_at	LOC115572	FAM46B	0.00017292	21.823	68.776	732.646	3.15154	1.2058e-06	12.903	49.397	81.936	3.82833	0.20357	17.366	23.9	1299.76	1.37625	0.7083	5.307	7.862	6569.59	-1.48144
11717168_a_at	LOC5187	PER1	5.9135e-07	9.741	33.734	131.773	3.46309	2.861e-09	11.862	60.928	212.521	5.1364	0.12071	10.643	14.488	81.936	1.36127	0.81917	7.075	7.762	6.875	-1.0971
